# Supplementary material for: Allele-Level Haplotype Frequencies and Pairwise Linkage Disequilibrium for 14 KIR Loci in 506 European-American Individuals
Source: PLoS One. 2012 Nov 5;7(11):e47491. doi: 10.1371/journal.pone.0047491 (PMC3489906; doi:10.1371/journal.pone.0047491)
Supplement: Table S3 — Allelic haplotype frequencies. Allelic haplotypes and their frequencies, along with the structural haplotype assignment of each. (XLSX) [file pone.0047491.s003.xlsx]

## Sheet: full haps
Supplemental Table 3. Allelic haplotype frequencies. Allelic haplotypes and their frequencies, along with the structural haplotype assignment of each.
structural haplotype	3DL3	2DS2	2DL2L3	2DL5C	2DS3S5C	2DL1C	2DL1T	2DL4T1	3DL1T1S1T1	2DL5T1	2DS3S5T1	2DL4T2	3DL1T2S1T2	2DL5T2	2DS3S5T2	2DS1	2DS4	3DL2	count	frequency
cB02~tA01	3DL3*003	2DS2*001	2DL2*003					2DL4T1*001	3DL1*002								2DS4*001	3DL2*002	31	0.0306
cA01~tA01	3DL3*009		2DL3*001			2DL1C*003		2DL4T1*011	3DL1*005								2DS4*007	3DL2*001	28	0.0277
cA01~tA01	3DL3*001		2DL3*002			2DL1C*002		2DL4T1*008	3DL1*004								2DS4*006	3DL2*005	23	0.0227
cA01~tA01	3DL3*001		2DL3*001			2DL1C*003		2DL4T1*001	3DL1*015								2DS4*001	3DL2*002	23	0.0227
cA01~tA01	3DL3*001		2DL3*002			2DL1C*002		2DL4T1*008	3DL1*001								2DS4*003	3DL2*001	20	0.0198
cA01~tA01	3DL3*001		2DL3*002			2DL1C*002		2DL4T1*001	3DL1*002								2DS4*001	3DL2*002	20	0.0198
cA01~tB01	3DL3*001		2DL3*001			2DL1C*003		2DL4T1*005	3DS1*013	2DL5T1*001	2DS5T1*002					2DS1*002		3DL2*007	18	0.0178
cA01~tA01	3DL3*009		2DL3*001			2DL1C*003		2DL4T1*001	3DL1*008								2DS4*003	3DL2*009	16	0.0158
cA01~tA01	3DL3*002		2DL3*001			2DL1C*003		2DL4T1*011	3DL1*005								2DS4*007	3DL2*001	14	0.0138
cB01~tB01	3DL3*003	2DS2*001	2DL2*001	2DL5C*002	2DS3C*001	2DL1C*004		2DL4T1*005	3DS1*013	2DL5T1*001	2DS5T1*002					2DS1*002		3DL2*007	14	0.0138
cA01~tA01	3DL3*002		2DL3*001			2DL1C*003		2DL4T1*008	3DL1*004								2DS4*006	3DL2*003	14	0.0138
cA01~tB01	3DL3*001		2DL3*002			2DL1C*002		2DL4T1*005	3DS1*013	2DL5T1*001	2DS5T1*002					2DS1*002		3DL2*007	14	0.0138
cB02~tA01	3DL3*003	2DS2*001	2DL2*003					2DL4T1*008	3DL1*001								2DS4*003	3DL2*001	12	0.0119
cB01~tB01	3DL3*003	2DS2*001	2DL2*001	2DL5C*002	2DS3C*001	2DL1C*004		2DL4T1*005	3DS1*013	2DL5T1*005	2DS3T1*002					2DS1*002		3DL2*007	12	0.0119
cA01~tA01	3DL3*009		2DL3*001			2DL1C*003		2DL4T1*008	3DL1*001								2DS4*003	3DL2*001	11	0.0109
cB02~tA01	3DL3*007	2DS2*001	2DL2*003					2DL4T1*008	3DL1*001								2DS4*003	3DL2*001	11	0.0109
cA01~tA01	3DL3*002		2DL3*001			2DL1C*003		2DL4T1*001	3DL1*008								2DS4*003	3DL2*009	10	0.0099
cA01~tA01	3DL3*002		2DL3*001			2DL1C*003		2DL4T1*008	3DL1*001								2DS4*003	3DL2*001	10	0.0099
cA01~tA01	3DL3*008		2DL3*001			2DL1C*003		2DL4T1*008	3DL1*001								2DS4*003	3DL2*001	9	0.0089
cA01~tA01	3DL3*002		2DL3*001			2DL1C*003		2DL4T1*001	3DL1*015								2DS4*001	3DL2*002	9	0.0089
cA01~tB01	3DL3*002		2DL3*001			2DL1C*003		2DL4T1*005	3DS1*013	2DL5T1*001	2DS5T1*002					2DS1*002		3DL2*007	9	0.0089
cB02~tA01	3DL3*014	2DS2*001	2DL2*003					2DL4T1*001	3DL1*002								2DS4*001	3DL2*002	8	0.0079
cA01~tA01	3DL3*001		2DL3*002			2DL1C*002		2DL4T1*001	3DL1*015								2DS4*001	3DL2*002	8	0.0079
cA01~tA01	3DL3*013		2DL3*002			2DL1C*002		2DL4T1*006	3DL1*007								2DS4*004	3DL2*008	8	0.0079
cA01~tA01	3DL3*002		2DL3*001			2DL1C*003		2DL4T1*008	3DL1*004								2DS4*006	3DL2*005	8	0.0079
cA01~tA01	3DL3*009		2DL3*001			2DL1C*003		2DL4T1*008	3DL1*004								2DS4*006	3DL2*003	8	0.0079
cA01~tA01	3DL3*013		2DL3*001			2DL1C*003		2DL4T1*008	3DL1*001								2DS4*003	3DL2*001	8	0.0079
cA01~tB01	3DL3*009		2DL3*001			2DL1C*003		2DL4T1*005	3DS1*013	2DL5T1*001	2DS5T1*002					2DS1*002		3DL2*007	7	0.0069
cB02~tB01	3DL3*007	2DS2*001	2DL2*003					2DL4T1*005	3DS1*013	2DL5T1*001	2DS5T1*002					2DS1*002		3DL2*007	7	0.0069
cA01~tA01	3DL3*009		2DL3*001			2DL1C*003		2DL4T1*001	3DL1*002								2DS4*001	3DL2*002	7	0.0069
cB04~tB03	3DL3*003	2DS2*001	2DL2*001	2DL5C*008							2DS5T1*002					2DS1*002		3DL2*007	7	0.0069
cA01~tA01	3DL3*001		2DL3*002			2DL1C*002		2DL4T1*001	3DL1*008								2DS4*003	3DL2*009	7	0.0069
cA01~tA01	3DL3*017		2DL3*002			2DL1C*002		2DL4T1*008	3DL1*001								2DS4*003	3DL2*001	7	0.0069
cB02~tA01	3DL3*014	2DS2*001	2DL2*003					2DL4T1*008	3DL1*001								2DS4*003	3DL2*001	7	0.0069
cA01~tA01	3DL3*002		2DL3*005			2DL1C*001		2DL4T1*008	3DL1*001								2DS4*003	3DL2*001	7	0.0069
cA01~tA01	3DL3*013		2DL3*002			2DL1C*002		2DL4T1*008	3DL1*004								2DS4*006	3DL2*003	7	0.0069
cA01~tA01	3DL3*013		2DL3*002			2DL1C*002		2DL4T1*008	3DL1*001								2DS4*003	3DL2*001	6	0.0059
cA01~tA01	3DL3*001		2DL3*002			2DL1C*002		2DL4T1*008	3DL1*009								2DS4*003	3DL2*011	6	0.0059
cB02~tA01	3DL3*003	2DS2*001	2DL2*001					2DL4T1*008	3DL1*001								2DS4*003	3DL2*011	6	0.0059
cB02~tA01	3DL3*003	2DS2*001	2DL2*003					2DL4T1*008	3DL1*001								2DS4*003	3DL2*011	5	0.0049
cB01~tA01	3DL3*003	2DS2*001	2DL2*001	2DL5C*002	2DS3C*001	2DL1C*004		2DL4T1*008	3DL1*001								2DS4*003	3DL2*001	5	0.0049
cB01~tB01	3DL3*014	2DS2*001	2DL2*005	2DL5C*002	2DS3C*001	2DL1C*004		2DL4T1*005	3DS1*013	2DL5T1*001	2DS5T1*002					2DS1*002		3DL2*007	5	0.0049
cA01~tA01	3DL3*002		2DL3*001			2DL1C*003		2DL4T1*001	3DL1*008								2DS4*003	3DL2*019	5	0.0049
cB02~tA01	3DL3*004	2DS2*001	2DL2*003					2DL4T1*001	3DL1*002								2DS4*001	3DL2*002	5	0.0049
cB01~tB01	3DL3*003	2DS2*001	2DL2*001	2DL5C*002	2DS3C*001	2DL1C*004		2DL4T1*005	3DS1*013	2DL5T1*005	2DS3T1*003N					2DS1*002		3DL2*007	5	0.0049
cB02~tB01	3DL3*003	2DS2*001	2DL2*003					2DL4T1*005	3DS1*013	2DL5T1*001	2DS5T1*002					2DS1*002		3DL2*007	5	0.0049
cA01~tA01	3DL3*002		2DL3*001			2DL1C*003		2DL4T1*011	3DL1*005								2DS4*003	3DL2*001	5	0.0049
cA01~tA01	3DL3*025		2DL3*005			2DL1C*001		2DL4T1*001	3DL1*002								2DS4*001	3DL2*002	5	0.0049
cB01~tB01	3DL3*014	2DS2*001	2DL2*001	2DL5C*002	2DS3C*001	2DL1C*004		2DL4T1*005	3DS1*013	2DL5T1*001	2DS5T1*002					2DS1*002		3DL2*007	5	0.0049
cA01~tB01	3DL3*006		2DL3*002			2DL1C*002		2DL4T1*005	3DS1*013	2DL5T1*001	2DS5T1*002					2DS1*002		3DL2*007	5	0.0049
cA01~tA01	3DL3*001		2DL3*002			2DL1C*002		2DL4T1*006	3DL1*007								2DS4*004	3DL2*008	5	0.0049
cA01~tA01	3DL3*009		2DL3*001			2DL1C*003		2DL4T1*001	3DL1*015								2DS4*001	3DL2*002	5	0.0049
cA01~tA01	3DL3*011		2DL3*001			2DL1C*003		2DL4T1*011	3DL1*005								2DS4*007	3DL2*001	4	0.004
cA01~tA01	3DL3*013		2DL3*001			2DL1C*003		2DL4T1*011	3DL1*005								2DS4*007	3DL2*001	4	0.004
cB02~tA01	3DL3*007	2DS2*001	2DL2*003					2DL4T1*008	3DL1*001								2DS4*003	3DL2*011	4	0.004
cA01~tA01	3DL3*001		2DL3*002			2DL1C*002		2DL4T1*011	3DL1*005								2DS4*003	3DL2*001	4	0.004
cA01~tB01	3DL3*013		2DL3*002			2DL1C*002		2DL4T1*005	3DS1*013	2DL5T1*001	2DS5T1*002					2DS1*002		3DL2*007	4	0.004
cA01~tA01	3DL3*006		2DL3*002			2DL1C*002		2DL4T1*001	3DL1*002								2DS4*001	3DL2*002	4	0.004
cB01~tB01	3DL3*003	2DS2*002	2DL2*001	2DL5C*002	2DS3C*001	2DL1C*004		2DL4T1*005	3DS1*013	2DL5T1*001	2DS5T1*002					2DS1*002		3DL2*007	4	0.004
cB01~tA01	3DL3*003	2DS2*002	2DL2*001	2DL5C*002	2DS3C*001	2DL1C*004		2DL4T1*011	3DL1*005								2DS4*007	3DL2*010	4	0.004
cB01~tA01	3DL3*003	2DS2*001	2DL2*001	2DL5C*002	2DS3C*001	2DL1C*004		2DL4T1*001	3DL1*015								2DS4*001	3DL2*002	4	0.004
cA01~tA01	3DL3*011		2DL3*001			2DL1C*003		2DL4T1*001	3DL1*008								2DS4*003	3DL2*009	4	0.004
cA01~tB01	3DL3*001		2DL3*002			2DL1C*002		2DL4T1*005	3DS1*049N	2DL5T1*001	2DS5T1*002					2DS1*002		3DL2*007	4	0.004
cA01~tA01	3DL3*001		2DL3*002			2DL1C*002		2DL4T1*011	3DL1*005								2DS4*007	3DL2*010	4	0.004
cB01~tA01	3DL3*003	2DS2*001	2DL2*001	2DL5C*002	2DS3C*001	2DL1C*004		2DL4T1*008	3DL1*004								2DS4*006	3DL2*005	4	0.004
cA01~tA01	3DL3*013		2DL3*002			2DL1C*002		2DL4T1*008	3DL1*004								2DS4*006	3DL2*005	4	0.004
cA01~tB01	3DL3*013		2DL3*001			2DL1C*003		2DL4T1*005	3DS1*013	2DL5T1*001	2DS5T1*002					2DS1*002		3DL2*007	4	0.004
cB01~tA01	3DL3*014	2DS2*001	2DL2*001	2DL5C*002	2DS3C*001	2DL1C*004		2DL4T1*001	3DL1*002								2DS4*001	3DL2*002	4	0.004
cB01~tA01	3DL3*003	2DS2*001	2DL2*001	2DL5C*002	2DS3C*001	2DL1C*004		2DL4T1*001	3DL1*002								2DS4*001	3DL2*002	4	0.004
cA01~tA01	3DL3*030		2DL3*001			2DL1C*003		2DL4T1*008	3DL1*001								2DS4*003	3DL2*001	4	0.004
cB01~tA01	3DL3*003	2DS2*001	2DL2*001	2DL5C*002	2DS3C*001	2DL1C*004		2DL4T1*011	3DL1*005								2DS4*007	3DL2*001	4	0.004
cA01~tA01	3DL3*002		2DL3*001			2DL1C*003		2DL4T1*001	3DL1*002								2DS4*001	3DL2*002	4	0.004
cB01~tA01	3DL3*003	2DS2*001	2DL2*001	2DL5C*002	2DS3C*001	2DL1C*004		2DL4T1*008	3DL1*009								2DS4*003	3DL2*011	4	0.004
cA01~tA01	3DL3*002		2DL3*001			2DL1C*003		2DL4T1*008	3DL1*019								2DS4*006	3DL2*005	4	0.004
cB01~tA01	3DL3*014	2DS2*001	2DL2*001	2DL5C*002	2DS3C*001	2DL1C*004		2DL4T1*006	3DL1*007								2DS4*004	3DL2*008	4	0.004
cA01~tA01	3DL3*001		2DL3*002			2DL1C*002		2DL4T1*011	3DL1*005								2DS4*007	3DL2*001	4	0.004
cA01~tA01	3DL3*001		2DL3*002			2DL1C*002		2DL4T1*008	3DL1*004								2DS4*006	3DL2*020	3	0.003
cA01~tB01	3DL3*015		2DL3*001			2DL1C*003		2DL4T1*005	3DS1*013	2DL5T1*001	2DS5T1*002					2DS1*002		3DL2*007	3	0.003
cB02~tA01	3DL3*014	2DS2*001	2DL2*001					2DL4T1*008	3DL1*004								2DS4*006	3DL2*003	3	0.003
cA01~tA01	3DL3*015		2DL3*001			2DL1C*003		2DL4T1*008	3DL1*004								2DS4*006	3DL2*003	3	0.003
cB01~tA01	3DL3*014	2DS2*001	2DL2*001	2DL5C*002	2DS3C*001	2DL1C*004		2DL4T1*008	3DL1*004								2DS4*006	3DL2*005	3	0.003
cB02~tA01	3DL3*007	2DS2*001	2DL2*003					2DL4T1*001	3DL1*008								2DS4*003	3DL2*009	3	0.003
cA01~tA01	3DL3*013		2DL3*002			2DL1C*002		2DL4T1*008	3DL1*004								2DS4*006	3DL2*009	3	0.003
cA01~tA01	3DL3*015		2DL3*001			2DL1C*003		2DL4T1*011	3DL1*005								2DS4*007	3DL2*001	3	0.003
cA01~tB01	3DL3*009		2DL3*001			2DL1C*003		2DL4T1*005	3DS1*013	2DL5T1*001	2DS5T1*002					2DS1*002		3DL2*018	3	0.003
cA01~tA01	3DL3*026		2DL3*002			2DL1C*002		2DL4T1*008	3DL1*001								2DS4*003	3DL2*001	3	0.003
cB02~tA01	3DL3*016	2DS2*001	2DL2*001					2DL4T1*008	3DL1*001								2DS4*003	3DL2*001	3	0.003
cA01~tA01	3DL3*008		2DL3*001			2DL1C*003		2DL4T1*011	3DL1*005								2DS4*007	3DL2*001	3	0.003
cA01~tA01	3DL3*027		2DL3*005			2DL1C*001		2DL4T1*001	3DL1*002								2DS4*001	3DL2*002	3	0.003
cA01~tA01	3DL3*001		2DL3*001			2DL1C*003		2DL4T1*001	3DL1*002								2DS4*001	3DL2*002	3	0.003
cA01~tA01	3DL3*009		2DL3*001			2DL1C*003		2DL4T1*011	3DL1*005								2DS4*007	3DL2*010	3	0.003
cB02~tA01	3DL3*014	2DS2*001	2DL2*003					2DL4T1*011	3DL1*005								2DS4*007	3DL2*001	3	0.003
cA01~tA01	3DL3*001		2DL3*001			2DL1C*003		2DL4T1*011	3DL1*005								2DS4*007	3DL2*001	3	0.003
cA01~tA01	3DL3*008		2DL3*001			2DL1C*003		2DL4T1*008	3DL1*004								2DS4*006	3DL2*003	3	0.003
cA01~tA01	3DL3*010		2DL3*001			2DL1C*003		2DL4T1*011	3DL1*005								2DS4*007	3DL2*001	3	0.003
cA01~tA01	3DL3*002		2DL3*001			2DL1C*003		2DL4T1*011	3DL1*005								2DS4*003	3DL2*010	3	0.003
cA01~tA01	3DL3*001		2DL3*002			2DL1C*002		2DL4T1*008	3DL1*004								2DS4*006	3DL2*011	3	0.003
cA01~tB05	3DL3*009		2DL3*001			2DL1C*003		2DL4T1*005	3DL1*005			2DL4T2*011					2DS4*007	3DL2*010	3	0.003
cB02~tB01	3DL3*014	2DS2*001	2DL2*001					2DL4T1*005	3DS1*013	2DL5T1*001	2DS5T1*002					2DS1*002		3DL2*007	2	0.002
cB02~tA01	3DL3*014	2DS2*001	2DL2*003					2DL4T1*008	3DL1*004								2DS4*006	3DL2*005	2	0.002
cA01~tA01	3DL3*010		2DL3*001			2DL1C*003		2DL4T1*008	3DL1*004								2DS4*006	3DL2*003	2	0.002
cA01~tA01	3DL3*001		2DL3*002			2DL1C*002		2DL4T1*008	3DL1*004								2DS4*006	3DL2*048	2	0.002
cB01~tA01	3DL3*003	2DS2*002	2DL2*001	2DL5C*002	2DS3C*001	2DL1C*004		2DL4T1*008	3DL1*001								2DS4*003	3DL2*001	2	0.002
cA02~tB07	3DL3*001		2DL3*001													2DS1*005			2	0.002
cA01~tA01	3DL3*001		2DL3*001			2DL1C*003		2DL4T1*011	3DL1*005								2DS4*003	3DL2*001	2	0.002
cB05~tB01	3DL3*003	2DS2*005				2DL1C*004		2DL4T1*005	3DS1*013	2DL5T1*001	2DS5T1*002					2DS1*002		3DL2*007	2	0.002
cA01~tA01	3DL3*013		2DL3*002			2DL1C*002		2DL4T1*008	3DL1*001								2DS4*003	3DL2*011	2	0.002
cB01~tB01	3DL3*007	2DS2*001	2DL2*001	2DL5C*002	2DS3C*001	2DL1C*004		2DL4T1*005	3DS1*013	2DL5T1*001	2DS5T1*002					2DS1*002		3DL2*007	2	0.002
cA01~tB01	3DL3*001		2DL3*001			2DL1C*003		2DL4T1*005	3DS1*013	2DL5T1*001	2DS5T1*002					2DS1*002		3DL2*010	2	0.002
cA01~tA01	3DL3*001		2DL3*001			2DL1C*003		2DL4T1*001	3DL1*008								2DS4*003	3DL2*009	2	0.002
cB04~tB03	3DL3*003	2DS2*001	2DL2*003	2DL5C*006							2DS5T1*002					2DS1*002		3DL2*007	2	0.002
cA01~tA01	3DL3*001		2DL3*002			2DL1C*008		2DL4T1*001	3DL1*015								2DS4*001	3DL2*002	2	0.002
cB02~tA01	3DL3*014	2DS2*001	2DL2*001					2DL4T1*001	3DL1*002								2DS4*001	3DL2*002	2	0.002
cA01~tA01	3DL3*002		2DL3*002			2DL1C*002		2DL4T1*001	3DL1*002								2DS4*001	3DL2*002	2	0.002
cB02~tA01	3DL3*003	2DS2*001	2DL2*001					2DL4T1*001	3DL1*008								2DS4*003	3DL2*009	2	0.002
cB04~tB03	3DL3*014	2DS2*001	2DL2*001	2DL5C*008							2DS5T1*002					2DS1*002		3DL2*034	2	0.002
cA01~tA01	3DL3*015		2DL3*005			2DL1C*001		2DL4T1*008	3DL1*004								2DS4*006	3DL2*005	2	0.002
cA01~tA01	3DL3*001		2DL3*002			2DL1C*002		2DL4T1*008	3DL1*004								2DS4*006	3DL2*003	2	0.002
cB02~tA01	3DL3*003	2DS2*001	2DL2*001					2DL4T1*001	3DL1*002								2DS4*001	3DL2*002	2	0.002
cA01~tA01	3DL3*009		2DL3*005			2DL1C*001		2DL4T1*008	3DL1*001								2DS4*003	3DL2*001	2	0.002
cA01~tA01	3DL3*003		2DL3*002			2DL1C*002		2DL4T1*001	3DL1*020								2DS4*001	3DL2*009	2	0.002
cA01~tA01	3DL3*003		2DL3*001			2DL1C*003		2DL4T1*008	3DL1*009								2DS4*003	3DL2*011	2	0.002
cB02~tA01	3DL3*003	2DS2*001	2DL2*003					2DL4T1*001	3DL1*008								2DS4*003	3DL2*009	2	0.002
cB01~tB01	3DL3*014	2DS2*001	2DL2*005	2DL5C*002	2DS3C*001	2DL1C*004		2DL4T1*005	3DS1*013	2DL5T1*005	2DS3T1*002					2DS1*002		3DL2*007	2	0.002
cA01~tB01	3DL3*010		2DL3*001			2DL1C*003		2DL4T1*005	3DS1*013	2DL5T1*001	2DS5T1*002					2DS1*002		3DL2*007	2	0.002
cB02~tA01	3DL3*004	2DS2*001	2DL2*003					2DL4T1*001	3DL1*020								2DS4*001	3DL2*009	2	0.002
cA01~tA01	3DL3*002		2DL3*001			2DL1C*003		2DL4T1*006	3DL1*007								2DS4*004	3DL2*008	2	0.002
cA01~tA01	3DL3*004		2DL3*001			2DL1C*003		2DL4T1*008	3DL1*001								2DS4*003	3DL2*001	2	0.002
cB01~tB01	3DL3*003	2DS2*002	2DL2*001	2DL5C*002	2DS3C*001	2DL1C*004		2DL4T1*005	3DS1*013	2DL5T1*005	2DS3T1*002					2DS1*002		3DL2*007	2	0.002
cA01~tA01	3DL3*008		2DL3*001			2DL1C*003		2DL4T1*008	3DL1*001								2DS4*003	3DL2*011	2	0.002
cB02~tA01	3DL3*002	2DS2*001	2DL2*003					2DL4T1*008	3DL1*004								2DS4*006	3DL2*003	2	0.002
cA01~tA01	3DL3*001		2DL3*002			2DL1C*002		2DL4T1*008	3DL1*001								2DS4*003	3DL2*011	2	0.002
cB02~tA01	3DL3*014	2DS2*001	2DL2*001					2DL4T1*008	3DL1*001								2DS4*003	3DL2*001	2	0.002
cA01~tA01	3DL3*041		2DL3*005			2DL1C*001		2DL4T1*008	3DL1*004								2DS4*006	3DL2*005	2	0.002
cA01~tA01	3DL3*015		2DL3*001			2DL1C*003		2DL4T1*008	3DL1*001								2DS4*003	3DL2*001	2	0.002
cA01~tA01	3DL3*001		2DL3*002			2DL1C*002		2DL4T1*008	3DL1*004								2DS4*006	3DL2*007	2	0.002
cA01~tA01	3DL3*002		2DL3*005			2DL1C*001		2DL4T1*001	3DL1*002								2DS4*001	3DL2*002	2	0.002
cA01~tA01	3DL3*027		2DL3*005			2DL1C*001		2DL4T1*008	3DL1*001								2DS4*003	3DL2*001	2	0.002
cB02~tA01	3DL3*007	2DS2*001	2DL2*003					2DL4T1*001	3DL1*002								2DS4*001	3DL2*002	2	0.002
cA01~tB01	3DL3*007		2DL3*001			2DL1C*003		2DL4T1*005	3DS1*013	2DL5T1*001	2DS5T1*002					2DS1*002		3DL2*007	2	0.002
cA01~tA01	3DL3*001		2DL3*002			2DL1C*008		2DL4T1*011	3DL1*005								2DS4*007	3DL2*010	2	0.002
cA01~tA01	3DL3*017		2DL3*002			2DL1C*002		2DL4T1*011	3DL1*005								2DS4*007	3DL2*001	2	0.002
cA01~tA01	3DL3*025		2DL3*005			2DL1C*001		2DL4T1*011	3DL1*005								2DS4*007	3DL2*001	2	0.002
cA01~tB04	3DL3*015		2DL3*001			2DL1C*003	2DL1T*004	2DL4T1*005	3DS1*013	2DL5T1*001	2DS3T1*001	2DL4T2*005	3DS1*013	2DL5T2*005	2DS5T2*002	2DS1*002		3DL2*007	2	0.002
cA01~tA01	3DL3*025		2DL3*005			2DL1C*001		2DL4T1*008	3DL1*004								2DS4*006	3DL2*005	2	0.002
cB02~tA01	3DL3*003	2DS2*001	2DL2*003					2DL4T1*008	3DL1*004								2DS4*006	3DL2*005	2	0.002
cA01~tA01	3DL3*001		2DL3*002			2DL1C*002		2DL4T1*001	3DL1*020								2DS4*001	3DL2*009	2	0.002
cB02~tA01	3DL3*003	2DS2*001	2DL2*001					2DL4T1*008	3DL1*004								2DS4*006	3DL2*003	2	0.002
cB01~tA01	3DL3*003	2DS2*001	2DL2*001	2DL5C*002	2DS3C*001	2DL1C*004		2DL4T1*001	3DL1*020								2DS4*001	3DL2*009	2	0.002
cB01~tB01	3DL3*003	2DS2*001	2DL2*003	2DL5C*016	2DS3C*001	2DL1C*004		2DL4T1*005	3DS1*013	2DL5T1*001	2DS5T1*002					2DS1*002		3DL2*007	1	0.001
cA01~tA01	3DL3*002		2DL3*001			2DL1C*003		2DL4T1*008	3DL1*001								2DS4*003	3DL2*010	1	0.001
cB01~tA01	3DL3*020	2DS2*001	2DL2*001	2DL5C*002	2DS3C*001	2DL1C*004		2DL4T1*008	3DL1*004								2DS4*006	3DL2*003	1	0.001
cA01~tA01	3DL3*015		2DL3*001			2DL1C*020		2DL4T1*008	3DL1*001								2DS4*003	3DL2*001	1	0.001
cA01~tA01	3DL3*014		2DL3*001			2DL1C*003		2DL4T1*001	3DL1*002								2DS4*001	3DL2*002	1	0.001
cB02~tA01	3DL3*001	2DS2*001	2DL2*003					2DL4T1*001	3DL1*020								2DS4*001	3DL2*009	1	0.001
cB01~tA01	3DL3*014	2DS2*001	2DL2*005	2DL5C*002	2DS3C*001	2DL1C*004		2DL4T1*008	3DL1*004								2DS4*006	3DL2*003	1	0.001
cB01~tA01	3DL3*003	2DS2*002	2DL2*001	2DL5C*002	2DS3C*001	2DL1C*004		2DL4T1*008	3DL1*004								2DS4*006	3DL2*003	1	0.001
cA01~tB06	3DL3*002		2DL3*002			2DL1C*002	2DL1T*004	2DL4T1*011	3DL1*005	2DL5T1*005	2DS3T1*001	2DL4T2*011					2DS4*003	3DL2*001	1	0.001
cA01~tA01	3DL3*013		2DL3*002			2DL1C*002		2DL4T1*016	3DL1*015								2DS4*001	3DL2*002	1	0.001
cB04~tB03	3DL3*003	2DS2*001	2DL2*001	2DL5C*002							2DS5T1*002					2DS1*002		3DL2*007	1	0.001
cB01~tA01	3DL3*003	2DS2*002	2DL2*001	2DL5C*002	2DS3C*001	2DL1C*004		2DL4T1*008	3DL1*004								2DS4*006	3DL2*005	1	0.001
cB01~tB01	3DL3*004	2DS2*007	2DL2*001	2DL5C*002	2DS3C*001	2DL1C*004		2DL4T1*005	3DS1*013	2DL5T1*005	2DS3T1*002					2DS1*002		3DL2*007	1	0.001
cA01~tA01	3DL3*011		2DL3*001			2DL1C*002		2DL4T1*008	3DL1*001								2DS4*003	3DL2*011	1	0.001
cA01~tA01	3DL3*019		2DL3*002			2DL1C*003		2DL4T1*008	3DL1*004								2DS4*006	3DL2*005	1	0.001
cA01~tA01	3DL3*041		2DL3*005			2DL1C*001		2DL4T1*008	3DL1*004								2DS4*006	3DL2*011	1	0.001
cA01~tA01	3DL3*002		2DL3*001			2DL1C*003		2DL4T1*008	3DL1*004								2DS4*006	3DL2*001	1	0.001
cA01~tA01	3DL3*002		2DL3*005			2DL1C*001		2DL4T1*011	3DL1*005								2DS4*007	3DL2*001	1	0.001
cA01~tB01	3DL3*018		2DL3*001			2DL1C*003		2DL4T1*012	3DS1*014	2DL5T1*015	2DS5T1*005					2DS1*008		3DL2*032	1	0.001
cB01~tB01	3DL3*003	2DS2*001	2DL2*001	2DL5C*002	2DS3C*001	2DL1C*004		2DL4T1*002	3DS1*013	2DL5T1*001	2DS5T1*002					2DS1*002		3DL2*007	1	0.001
cA01~tB05	3DL3*011		2DL3*001			2DL1C*003		2DL4T1*008	3DL1*004			2DL4T2*008					2DS4*006	3DL2*003	1	0.001
cA01~tA01	3DL3*018		2DL3*001			2DL1C*003		2DL4T1*008	3DL1*019								2DS4*006	3DL2*005	1	0.001
cB04~tB03	3DL3*014	2DS2*001	2DL2*001	2DL5C*008							2DS5T1*002					2DS1*002		3DL2*007	1	0.001
cA01~tA01	3DL3*043		2DL3*001			2DL1C*003		2DL4T1*008	3DL1*004								2DS4*006	3DL2*005	1	0.001
cB04~tB03	3DL3*003	2DS2*001	2DL2*001	2DL5C*002							2DS3T1*002					2DS1*002		3DL2*007	1	0.001
cB02~tB01	3DL3*007	2DS2*001	2DL2*003					2DL4T1*011	3DS1*010	2DL5T1*005	2DS3T1*002					2DS1*002		3DL2*007	1	0.001
cA01~tA01	3DL3*010		2DL3*001			2DL1C*003		2DL4T1*008	3DL1*004								2DS4*006	3DL2*011	1	0.001
cA01~tA01	3DL3*001		2DL3*001			2DL1C*003		2DL4T1*008	3DL1*004								2DS4*006	3DL2*003	1	0.001
cA01~tA01	3DL3*044		2DL3*001			2DL1C*003		2DL4T1*008	3DL1*001								2DS4*003	3DL2*001	1	0.001
cA01~tB01	3DL3*015		2DL3*005			2DL1C*001		2DL4T1*005	3DS1*013	2DL5T1*005	2DS3T1*002					2DS1*002		3DL2*007	1	0.001
cA01~tB01	3DL3*009		2DL3*003			2DL1C*003		2DL4T1*005	3DS1*013	2DL5T1*001	2DS5T1*002					2DS1*002		3DL2*007	1	0.001
cA01~tB06	3DL3*007		2DL3*002			2DL1C*002	2DL1T*001	2DL4T1*006	3DL1*007	2DL5T1*001	2DS5T1*002	2DL4T2*006					2DS4*004	3DL2*008	1	0.001
cB02~tB01	3DL3*001	2DS2*001	2DL2*003					2DL4T1*005	3DS1*013	2DL5T1*001	2DS5T1*002					2DS1*002		3DL2*007	1	0.001
cB02~tB01	3DL3*001	2DS2*001	2DL2*003					2DL4T1*005	3DS1*013	2DL5T1*005	2DS3T1*002					2DS1*002		3DL2*007	1	0.001
cB01~tB01	3DL3*003	2DS2*001	2DL2*001	2DL5C*002	2DS3C*001	2DL1C*007		2DL4T1*005	3DS1*013	2DL5T1*001	2DS5T1*002					2DS1*002		3DL2*007	1	0.001
cA01~tA01	3DL3*001		2DL3*002			2DL1C*002		2DL4T1*008	3DL1*004								2DS4*006	3DL2*009	1	0.001
cB02~tA01	3DL3*014	2DS2*001	2DL2*003					2DL4T1*008	3DL1*004								2DS4*006	3DL2*003	1	0.001
cA01~tB01	3DL3*010		2DL3*001			2DL1C*003		2DL4T1*005	3DS1*013	2DL5T1*001	2DS5T1*002					2DS1*006		3DL2*007	1	0.001
cA01~tB04	3DL3*041		2DL3*005			2DL1C*002	2DL1T*001	2DL4T1*005	3DS1*013	2DL5T1*001	2DS5T1*002	2DL4T2*005	3DS1*013	2DL5T2*001	2DS5T2*002	2DS1*002		3DL2*007	1	0.001
cA01~tB05	3DL3*010		2DL3*002			2DL1C*002		2DL4T1*002	3DL1*072			2DL4T2*005					2DS4*006	3DL2*003	1	0.001
cA01~tA01	3DL3*013		2DL3*001			2DL1C*003		2DL4T1*001	3DL1*002								2DS4*001	3DL2*002	1	0.001
cB01~tB01	3DL3*028	2DS2*001	2DL2*001	2DL5C*002	2DS3C*001	2DL1C*004		2DL4T1*005	3DS1*013	2DL5T1*001	2DS5T1*002					2DS1*002		3DL2*007	1	0.001
cB01~tA01	3DL3*036	2DS2*001	2DL2*003	2DL5C*002	2DS3C*001	2DL1C*004		2DL4T1*001	3DL1*002								2DS4*001	3DL2*002	1	0.001
cB01~tA01	3DL3*014	2DS2*001	2DL2*001	2DL5C*002	2DS3C*001	2DL1C*004		2DL4T1*008	3DL1*009								2DS4*003	3DL2*011	1	0.001
cA01~tA01	3DL3*002		2DL3*001			2DL1C*003		2DL4T1*011	3DL1*053								2DS4*003	3DL2*010	1	0.001
cB02~tA01	3DL3*003	2DS2*001	2DL2*003					2DL4T1*001	3DL1*008								2DS4*003	3DL2*019	1	0.001
cA01~tA01	3DL3*013		2DL3*002			2DL1C*001		2DL4T1*006	3DL1*019								2DS4*004	3DL2*008	1	0.001
cA01~tA01	3DL3*009		2DL3*003			2DL1C*003		2DL4T1*005	3DL1*005								2DS4*007	3DL2*001	1	0.001
cB01~tB01	3DL3*028	2DS2*002	2DL2*001	2DL5C*002	2DS3C*001	2DL1C*004		2DL4T1*011	3DS1*013	2DL5T1*005	2DS3T1*002					2DS1*002		3DL2*007	1	0.001
cB01~tA01	3DL3*003	2DS2*002	2DL2*001	2DL5C*002	2DS3C*001	2DL1C*009		2DL4T1*011	3DL1*005								2DS4*007	3DL2*010	1	0.001
cB03~tA01	3DL3*009		2DL3*001	2DL5C*002	2DS3C*001	2DL1C*004		2DL4T1*008	3DL1*001								2DS4*003	3DL2*001	1	0.001
cA01~tA01	3DL3*006		2DL3*001			2DL1C*003		2DL4T1*001	3DL1*015								2DS4*001	3DL2*002	1	0.001
cA01~tA01	3DL3*010		2DL3*002			2DL1C*002		2DL4T1*011	3DL1*005								2DS4*007	3DL2*001	1	0.001
cB01~tB01	3DL3*028	2DS2*001	2DL2*001	2DL5C*002	2DS3C*001	2DL1C*004		2DL4T1*005	3DS1*013	2DL5T1*001	2DS5T1*002					2DS1*002		3DL2*019	1	0.001
cB02~tB01	3DL3*003	2DS2*001	2DL2*003					2DL4T1*011	3DS1*013	2DL5T1*005	2DS3T1*002					2DS1*002		3DL2*007	1	0.001
cB02~tA01	3DL3*020	2DS2*001	2DL2*001					2DL4T1*011	3DL1*005								2DS4*003	3DL2*001	1	0.001
cA01~tA01	3DL3*006		2DL3*002			2DL1C*002		2DL4T1*011	3DL1*005								2DS4*007	3DL2*001	1	0.001
cB02~tA01	3DL3*014	2DS2*001	2DL2*005					2DL4T1*008	3DL1*004								2DS4*006	3DL2*005	1	0.001
cA01~tA01	3DL3*005		2DL3*001			2DL1C*003		2DL4T1*011	3DL1*005								2DS4*007	3DL2*001	1	0.001
cA01~tA01	3DL3*005		2DL3*006			2DL1C*003		2DL4T1*001	3DL1*018								2DS4*001	3DL2*002	1	0.001
cA01~tA01	3DL3*001		2DL3*002			2DL1C*002		2DL4T1*008	3DL1*001								2DS4*003	3DL2*006	1	0.001
cB01~tB01	3DL3*003	2DS2*002	2DL2*001	2DL5C*002	2DS3C*001	2DL1C*004		2DL4T1*005	3DS1*013	2DL5T1*014	2DS5T1*002					2DS1*002		3DL2*007	1	0.001
cA01~tA01	3DL3*002		2DL3*001			2DL1C*003		2DL4T1*011	3DL1*015								2DS4*003	3DL2*001	1	0.001
cB02~tB01	3DL3*004	2DS2*001	2DL2*001					2DL4T1*005	3DS1*013	2DL5T1*005	2DS3T1*002					2DS1*002		3DL2*007	1	0.001
cB01~tB01	3DL3*003	2DS2*001	2DL2*003	2DL5C*005	2DS3C*001	2DL1C*004		2DL4T1*005	3DS1*013	2DL5T1*005	2DS3T1*001					2DS1*002		3DL2*007	1	0.001
cB01~tB01	3DL3*003	2DS2*001	2DL2*005	2DL5C*002	2DS3C*001	2DL1C*004		2DL4T1*005	3DS1*013	2DL5T1*001	2DS5T1*002					2DS1*002		3DL2*007	1	0.001
cA01~tA01	3DL3*002		2DL3*001			2DL1C*003		2DL4T1*008	3DL1*004								2DS4*006	3DL2*011	1	0.001
cA01~tA01	3DL3*021		2DL3*001			2DL1C*003		2DL4T1*001	3DL1*015								2DS4*001	3DL2*002	1	0.001
cA01~tA01	3DL3*011		2DL3*001			2DL1C*020		2DL4T1*001	3DL1*020								2DS4*001	3DL2*009	1	0.001
cB01~tA01	3DL3*001	2DS2*001	2DL2*001	2DL5C*002	2DS3C*001	2DL1C*004		2DL4T1*010	3DL1*033								2DS4*004	3DL2*008	1	0.001
cB02~tB01	3DL3*010	2DS2*001	2DL2*001					2DL4T1*005	3DS1*013	2DL5T1*001	2DS5T1*002					2DS1*002		3DL2*007	1	0.001
cA01~tA01	3DL3*009		2DL3*001			2DL1C*003		2DL4T1*001	3DL1*001								2DS4*003	3DL2*009	1	0.001
cA01~tA01	3DL3*015		2DL3*005			2DL1C*001		2DL4T1*008	3DL1*002								2DS4*001	3DL2*002	1	0.001
cA01~tA01	3DL3*015		2DL3*001			2DL1C*003		2DL4T1*008	3DL1*004								2DS4*006	3DL2*005	1	0.001
cA01~tA01	3DL3*001		2DL3*001			2DL1C*003		2DL4T1*001	3DL1*015								2DS4*001	3DL2*015	1	0.001
cA01~tA01	3DL3*015		2DL3*005			2DL1C*001		2DL4T1*001	3DL1*002								2DS4*001	3DL2*002	1	0.001
cB02~tA01	3DL3*003	2DS2*001	2DL2*003					2DL4T1*001	3DL1*015								2DS4*001	3DL2*002	1	0.001
cB02~tA01	3DL3*020	2DS2*001	2DL2*003					2DL4T1*001	3DL1*015								2DS4*001	3DL2*002	1	0.001
cA01~tA01	3DL3*004		2DL3*001			2DL1C*003		2DL4T1*001	3DL1*008								2DS4*003	3DL2*009	1	0.001
cB01~tB01	3DL3*014	2DS2*001	2DL2*005	2DL5C*002	2DS3C*001	2DL1C*004		2DL4T1*005	3DS1*013	2DL5T1*005	2DS3T1*003N					2DS1*002		3DL2*007	1	0.001
cA01~tA01	3DL3*009		2DL3*001			2DL1C*020		2DL4T1*011	3DL1*005								2DS4*007	3DL2*001	1	0.001
cB01~tA01	3DL3*009	2DS2*001	2DL2*001	2DL5C*002	2DS3C*001	2DL1C*004		2DL4T1*011	3DL1*005								2DS4*007	3DL2*007	1	0.001
cA01~tA01	3DL3*002		2DL3*001			2DL1C*003		2DL4T1*011	3DL1*004								2DS4*006	3DL2*003	1	0.001
cA01~tB01	3DL3*010		2DL3*003			2DL1C*003		2DL4T1*005	3DS1*013	2DL5T1*001	2DS5T1*002					2DS1*002		3DL2*007	1	0.001
cB01~tB01	3DL3*004	2DS2*001	2DL2*001	2DL5C*002	2DS3C*001	2DL1C*007		2DL4T1*005	3DS1*013	2DL5T1*001	2DS5T1*002					2DS1*002		3DL2*006	1	0.001
cA01~tA01	3DL3*013		2DL3*002			2DL1C*002		2DL4T1*002	3DL1*001								2DS4*003	3DL2*047	1	0.001
cA01~tA01	3DL3*011		2DL3*001			2DL1C*003		2DL4T1*008	3DL1*004								2DS4*006	3DL2*011	1	0.001
cA01~tA01	3DL3*013		2DL3*001			2DL1C*003		2DL4T1*011	3DL1*005								2DS4*007	3DL2*045	1	0.001
cA01~tA01	3DL3*009		2DL3*001			2DL1C*003		2DL4T1*011	3DL1*005								2DS4*003	3DL2*044	1	0.001
cB02~tA01	3DL3*003	2DS2*001	2DL2*003					2DL4T1*001	3DL1*020								2DS4*001	3DL2*009	1	0.001
cA01~tB01	3DL3*002		2DL3*001			2DL1C*003		2DL4T1*005	3DS1*013	2DL5T1*001	2DS5T1*002					2DS1*002		3DL2*018	1	0.001
cB02~tB01	3DL3*007	2DS2*001	2DL2*003					2DL4T1*014	3DS1*013	2DL5T1*001	2DS5T1*002					2DS1*002		3DL2*007	1	0.001
cA01~tB01	3DL3*041		2DL3*005			2DL1C*001		2DL4T1*005	3DS1*013	2DL5T1*001	2DS5T1*002					2DS1*002		3DL2*007	1	0.001
cA01~tA01	3DL3*002		2DL3*001			2DL1C*003		2DL4T1*001	3DL1*018								2DS4*001	3DL2*013	1	0.001
cA01~tB01	3DL3*009		2DL3*001			2DL1C*003		2DL4T1*005	3DS1*013	2DL5T1*001	2DS5T1*002					2DS1*002		3DL2*006	1	0.001
cA01~tA01	3DL3*013		2DL3*002			2DL1C*002		2DL4T1*001	3DL1*002								2DS4*001	3DL2*002	1	0.001
cB02~tA01	3DL3*007	2DS2*001	2DL2*003					2DL4T1*008	3DL1*001								2DS4*003	3DL2*006	1	0.001
cA01~tB01	3DL3*041		2DL3*005			2DL1C*001		2DL4T1*005	3DS1*013	2DL5T1*005	2DS3T1*001					2DS1*002		3DL2*007	1	0.001
cA01~tA01	3DL3*002		2DL3*005			2DL1C*001		2DL4T1*008	3DL1*004								2DS4*006	3DL2*005	1	0.001
cA01~tA01	3DL3*001		2DL3*002			2DL1C*002		2DL4T1*009	3DL1*004								2DS4*006	3DL2*003	1	0.001
cB05~tA01	3DL3*003	2DS2*005				2DL1C*004		2DL4T1*006	3DL1*007								2DS4*004	3DL2*008	1	0.001
cA01~tB06	3DL3*025		2DL3*005			2DL1C*002	2DL1T*001	2DL4T1*008	3DL1*016	2DL5T1*001	2DS5T1*002	2DL4T2*008					2DS4*003	3DL2*001	1	0.001
cA01~tB05	3DL3*046		2DL3*001			2DL1C*003		2DL4T1*005	3DL1*005			2DL4T2*005					2DS4*007	3DL2*001	1	0.001
cB02~tA01	3DL3*016	2DS2*001	2DL2*001					2DL4T1*001	3DL1*020								2DS4*001	3DL2*009	1	0.001
cA01~tA01	3DL3*002		2DL3*001			2DL1C*003		2DL4T1*001	3DL1*008								2DS4*003	3DL2*005	1	0.001
cA01~tA01	3DL3*013		2DL3*001			2DL1C*001		2DL4T1*008	3DL1*001								2DS4*003	3DL2*001	1	0.001
cA01~tB01	3DL3*013		2DL3*002			2DL1C*002		2DL4T1*008	3DS1*013	2DL5T1*005	2DS3T1*001					2DS1*002		3DL2*009	1	0.001
cA01~tB05	3DL3*001		2DL3*002			2DL1C*002		2DL4T1*005	3DL1*004			2DL4T2*005					2DS4*006	3DL2*007	1	0.001
cA01~tB05	3DL3*044		2DL3*001			2DL1C*003		2DL4T1*002	3DL1*019			2DL4T2*002					2DS4*006	3DL2*005	1	0.001
cA01~tB05	3DL3*013		2DL3*002			2DL1C*002		2DL4T1*005	3DL1*005			2DL4T2*011					2DS4*007	3DL2*011	1	0.001
cB04~tB03	3DL3*003	2DS2*002	2DL2*001	2DL5C*002							2DS3T1*002					2DS1*002		3DL2*007	1	0.001
cA01~tA01	3DL3*002		2DL3*002			2DL1C*002		2DL4T1*002	3DL1*004								2DS4*006	3DL2*005	1	0.001
cB01~tA01	3DL3*004	2DS2*001	2DL2*001	2DL5C*002	2DS3C*001	2DL1C*004		2DL4T1*008	3DL1*001								2DS4*003	3DL2*001	1	0.001
cA01~tA01	3DL3*027		2DL3*005			2DL1C*001		2DL4T1*008	3DL1*004								2DS4*006	3DL2*005	1	0.001
cB02~tA01	3DL3*007	2DS2*001	2DL2*003					2DL4T1*001	3DL1*020								2DS4*001	3DL2*009	1	0.001
cA01~tA01	3DL3*006		2DL3*001			2DL1C*003		2DL4T1*001	3DL1*002								2DS4*001	3DL2*002	1	0.001
cB02~tA01	3DL3*003	2DS2*001	2DL2*003					2DL4T1*008	3DL1*001								2DS4*003	3DL2*010	1	0.001
cA01~tA01	3DL3*013		2DL3*002			2DL1C*002		2DL4T1*001	3DL1*008								2DS4*003	3DL2*009	1	0.001
cA01~tA01	3DL3*025		2DL3*005			2DL1C*001		2DL4T1*008	3DL1*001								2DS4*003	3DL2*001	1	0.001
cA01~tB01	3DL3*025		2DL3*005			2DL1C*001		2DL4T1*005	3DS1*013	2DL5T1*001	2DS5T1*002					2DS1*002		3DL2*007	1	0.001
cB01~tA01	3DL3*014	2DS2*001	2DL2*001	2DL5C*002	2DS3C*001	2DL1C*004		2DL4T1*005	3DL1*002								2DS4*001	3DL2*009	1	0.001
cB01~tB01	3DL3*014	2DS2*001	2DL2*003	2DL5C*002	2DS3C*001	2DL1C*004		2DL4T1*001	3DS1*013	2DL5T1*005	2DS3T1*002					2DS1*002		3DL2*015	1	0.001
cB02~tA01	3DL3*014	2DS2*001	2DL2*001					2DL4T1*008	3DL1*052								2DS4*003	3DL2*011	1	0.001
cB01~tA01	3DL3*045	2DS2*001	2DL2*001	2DL5C*002	2DS3C*001	2DL1C*004		2DL4T1*011	3DL1*005								2DS4*007	3DL2*006	1	0.001
cA01~tA01	3DL3*013		2DL3*002			2DL1C*002		2DL4T1*005	3DL1*005								2DS4*007	3DL2*001	1	0.001
cA01~tA01	3DL3*019		2DL3*002			2DL1C*002		2DL4T1*008	3DL1*019								2DS4*006	3DL2*005	1	0.001
cA01~tB06	3DL3*013		2DL3*002			2DL1C*002	2DL1T*001	2DL4T1*006	3DL1*007	2DL5T1*001	2DS5T1*002	2DL4T2*005					2DS4*004	3DL2*008	1	0.001
cA01~tB01	3DL3*001		2DL3*002			2DL1C*002		2DL4T1*005	3DS1*013	2DL5T1*005	2DS3T1*002					2DS1*002		3DL2*007	1	0.001
cA01~tB01	3DL3*027		2DL3*005			2DL1C*001		2DL4T1*005	3DS1*013	2DL5T1*001	2DS5T1*002					2DS1*002		3DL2*006	1	0.001
cB02~tA01	3DL3*014	2DS2*001	2DL2*003					2DL4T1*001	3DL1*008								2DS4*003	3DL2*009	1	0.001
cA01~tB01	3DL3*010		2DL3*001			2DL1C*003		2DL4T1*005	3DS1*013	2DL5T1*005	2DS3T1*002					2DS1*002		3DL2*007	1	0.001
cA01~tA01	3DL3*042		2DL3*002			2DL1C*002		2DL4T1*001	3DL1*015								2DS4*001	3DL2*013	1	0.001
cA01~tA01	3DL3*013		2DL3*002			2DL1C*002		2DL4T1*015	3DL1*002								2DS4*001	3DL2*002	1	0.001
cB02~tB01	3DL3*004	2DS2*001	2DL2*003					2DL4T1*005	3DS1*013	2DL5T1*001	2DS5T1*002					2DS1*002		3DL2*018	1	0.001
cA01~tB04	3DL3*009		2DL3*001			2DL1C*003	2DL1T*001	2DL4T1*005	3DS1*013	2DL5T1*005	2DS3T1*001	2DL4T2*011	3DS1*013	2DL5T2*005	2DS3T2*001	2DS1*002		3DL2*006	1	0.001
cB02~tA01	3DL3*003	2DS2*001	2DL2*003					2DL4T1*011	3DL1*005								2DS4*007	3DL2*010	1	0.001
cA01~tA01	3DL3*001		2DL3*002			2DL1C*002		2DL4T1*002	3DL1*001								2DS4*003	3DL2*001	1	0.001
cA01~tA01	3DL3*010		2DL3*001			2DL1C*003		2DL4T1*008	3DL1*004								2DS4*006	3DL2*005	1	0.001
cB02~tB01	3DL3*003	2DS2*001	2DL2*003					2DL4T1*005	3DS1*013	2DL5T1*005	2DS3T1*002					2DS1*002		3DL2*020	1	0.001
cA01~tA01	3DL3*015		2DL3*001			2DL1C*003		2DL4T1*008	3DL1*001								2DS4*008	3DL2*001	1	0.001
cA01~tB01	3DL3*013		2DL3*002			2DL1C*021		2DL4T1*005	3DS1*013	2DL5T1*001	2DS5T1*002					2DS1*002		3DL2*007	1	0.001
cB01~tA01	3DL3*003	2DS2*001	2DL2*001	2DL5C*002	2DS3C*001	2DL1C*004		2DL4T1*002	3DL1*052								2DS4*003	3DL2*011	1	0.001
cB02~tA01	3DL3*003	2DS2*001	2DL2*001					2DL4T1*008	3DL1*001								2DS4*003	3DL2*003	1	0.001
cB01~tA01	3DL3*003	2DS2*001	2DL2*001	2DL5C*002	2DS3C*001	2DL1C*004		2DL4T1*001	3DL1*017								2DS4*001	3DL2*021	1	0.001
cB02~tB01	3DL3*009	2DS2*001	2DL2*003					2DL4T1*005	3DS1*013	2DL5T1*005	2DS3T1*001					2DS1*002		3DL2*006	1	0.001
cB01~tB01	3DL3*003	2DS2*001	2DL2*005	2DL5C*002	2DS3C*001	2DL1C*004		2DL4T1*005	3DS1*013	2DL5T1*005	2DS3T1*002					2DS1*002		3DL2*007	1	0.001
cB01~tA01	3DL3*014	2DS2*001	2DL2*005	2DL5C*002	2DS3C*001	2DL1C*004		2DL4T1*008	3DL1*052								2DS4*003	3DL2*011	1	0.001
cA01~tA01	3DL3*002		2DL3*001			2DL1C*003		2DL4T1*008	3DL1*004								2DS4*006	3DL2*009	1	0.001
cB02~tA01	3DL3*003	2DS2*001	2DL2*003					2DL4T1*008	3DL1*009								2DS4*003	3DL2*011	1	0.001
cB05~tA01	3DL3*003	2DS2*005				2DL1C*004		2DL4T1*001	3DL1*020								2DS4*001	3DL2*009	1	0.001
cA01~tB05	3DL3*001		2DL3*002			2DL1C*002		2DL4T1*001	3DL1*002			2DL4T2*001					2DS4*001	3DL2*002	1	0.001
cB01~tA01	3DL3*014	2DS2*001	2DL2*001	2DL5C*002	2DS3C*001	2DL1C*004		2DL4T1*005	3DL1*005								2DS4*007	3DL2*001	1	0.001
cA01~tB05	3DL3*014		2DL3*002			2DL1C*002		2DL4T1*001	3DL1*002			2DL4T2*005					2DS4*001	3DL2*002	1	0.001
cB01~tA01	3DL3*001	2DS2*001	2DL2*001	2DL5C*002	2DS3C*001	2DL1C*004		2DL4T1*001	3DL1*020								2DS4*001	3DL2*009	1	0.001
cA01~tA01	3DL3*013		2DL3*002			2DL1C*002		2DL4T1*011	3DL1*005								2DS4*007	3DL2*001	1	0.001
cB02~tA01	3DL3*014	2DS2*001	2DL2*001					2DL4T1*011	3DL1*005								2DS4*007	3DL2*010	1	0.001
cB02~tB01	3DL3*014	2DS2*001	2DL2*003					2DL4T1*005	3DS1*013	2DL5T1*001	2DS5T1*002					2DS1*002		3DL2*018	1	0.001
cB02~tA01	3DL3*014	2DS2*001	2DL2*001					2DL4T1*008	3DL1*001								2DS4*003	3DL2*011	1	0.001
cB02~tA01	3DL3*020	2DS2*001	2DL2*003					2DL4T1*011	3DL1*005								2DS4*007	3DL2*001	1	0.001
cA01~tA01	3DL3*013		2DL3*002			2DL1C*002		2DL4T1*002	3DL1*001								2DS4*003	3DL2*011	1	0.001
cB01~tA01	3DL3*016	2DS2*001	2DL2*001	2DL5C*002	2DS3C*001	2DL1C*004		2DL4T1*002	3DL1*009								2DS4*003	3DL2*010	1	0.001
cA01~tA01	3DL3*025		2DL3*005			2DL1C*001		2DL4T1*001	3DL1*015								2DS4*001	3DL2*002	1	0.001
cA01~tA01	3DL3*026		2DL3*002			2DL1C*002		2DL4T1*006	3DL1*007								2DS4*004	3DL2*008	1	0.001
cA01~tB06	3DL3*003		2DL3*001			2DL1C*003	2DL1T*004	2DL4T1*005	3DL1*009	2DL5T1*005	2DS3T1*001	2DL4T2*005					2DS4*003	3DL2*001	1	0.001
cB01~tA01	3DL3*020	2DS2*001	2DL2*001	2DL5C*002	2DS3C*001	2DL1C*004		2DL4T1*008	3DL1*001								2DS4*003	3DL2*003	1	0.001
cA01~tB01	3DL3*013		2DL3*001			2DL1C*003		2DL4T1*005	3DS1*013	2DL5T1*001	2DS3T1*003N					2DS1*002		3DL2*007	1	0.001
cB01~tA01	3DL3*003	2DS2*001	2DL2*001	2DL5C*002	2DS3C*001	2DL1C*004		2DL4T1*008	3DL1*004								2DS4*006	3DL2*003	1	0.001
cA01~tB05	3DL3*009		2DL3*001			2DL1C*003		2DL4T1*001	3DL1*002			2DL4T2*005					2DS4*001	3DL2*010	1	0.001
cA01~tA01	3DL3*006		2DL3*002			2DL1C*001		2DL4T1*001	3DL1*002								2DS4*001	3DL2*001	1	0.001
cA01~tA01	3DL3*002		2DL3*001			2DL1C*003		2DL4T1*011	3DL1*005								2DS4*007	3DL2*010	1	0.001
cA01~tA01	3DL3*030		2DL3*002			2DL1C*002		2DL4T1*008	3DL1*004								2DS4*006	3DL2*005	1	0.001
cB01~tA01	3DL3*003	2DS2*001	2DL2*001	2DL5C*002	2DS3C*001	2DL1C*004		2DL4T1*006	3DL1*007								2DS4*004	3DL2*008	1	0.001
cA01~tB05	3DL3*010		2DL3*001			2DL1C*003		2DL4T1*005	3DL1*005			2DL4T2*011					2DS4*007	3DL2*001	1	0.001
cB01~tA01	3DL3*003	2DS2*001	2DL2*001	2DL5C*002	2DS3C*001	2DL1C*004		2DL4T1*001	3DL1*008								2DS4*003	3DL2*009	1	0.001
cA01~tA01	3DL3*013		2DL3*002			2DL1C*002		2DL4T1*011	3DL1*005								2DS4*007	3DL2*010	1	0.001
cA01~tA01	3DL3*019		2DL3*002			2DL1C*002		2DL4T1*001	3DL1*008								2DS4*003	3DL2*043	1	0.001
cA01~tA01	3DL3*001		2DL3*001			2DL1C*003		2DL4T1*001	3DL1*020								2DS4*001	3DL2*009	1	0.001
cA01~tA01	3DL3*015		2DL3*001			2DL1C*003		2DL4T1*011	3DL1*073								2DS4*007	3DL2*010	1	0.001
cA01~tB05	3DL3*002		2DL3*001			2DL1C*003		2DL4T1*001	3DL1*002			2DL4T2*005					2DS4*003	3DL2*001	1	0.001
cA01~tA01	3DL3*013		2DL3*001			2DL1C*003		2DL4T1*001	3DL1*015								2DS4*001	3DL2*002	1	0.001
cB01~tB01	3DL3*003	2DS2*002	2DL2*001	2DL5C*009	2DS3C*001	2DL1C*004		2DL4T1*005	3DS1*013	2DL5T1*001	2DS5T1*002					2DS1*002		3DL2*007	1	0.001
cA01~tA01	3DL3*031		2DL3*005			2DL1C*001		2DL4T1*008	3DL1*001								2DS4*003	3DL2*010	1	0.001
cA01~tA01	3DL3*006		2DL3*002			2DL1C*008		2DL4T1*001	3DL1*015								2DS4*001	3DL2*002	1	0.001
cB02~tB01	3DL3*047	2DS2*001	2DL2*003					2DL4T1*005	3DS1*013	2DL5T1*001	2DS5T1*002					2DS1*002		3DL2*007	1	0.001
cA01~tA01	3DL3*003		2DL3*001			2DL1C*003		2DL4T1*008	3DL1*001								2DS4*003	3DL2*010	1	0.001
cB01~tA01	3DL3*018	2DS2*002	2DL2*001	2DL5C*002	2DS3C*001	2DL1C*004		2DL4T1*011	3DL1*005								2DS4*007	3DL2*001	1	0.001
cA01~tA01	3DL3*001		2DL3*001			2DL1C*009		2DL4T1*005	3DL1*004								2DS4*006	3DL2*046	1	0.001
cB02~tB01	3DL3*007	2DS2*001	2DL2*003					2DL4T1*008	3DS1*013	2DL5T1*001	2DS5T1*002					2DS1*002		3DL2*007	1	0.001
cA01~tA01	3DL3*017		2DL3*002			2DL1C*001		2DL4T1*008	3DL1*001								2DS4*003	3DL2*001	1	0.001
cB01~tB01	3DL3*020	2DS2*001	2DL2*001	2DL5C*002	2DS3C*001	2DL1C*004		2DL4T1*011	3DS1*013	2DL5T1*005	2DS3T1*002					2DS1*002		3DL2*006	1	0.001
cA01~tA01	3DL3*002		2DL3*001			2DL1C*003		2DL4T1*011	3DL1*009								2DS4*003	3DL2*011	1	0.001
cA01~tB06	3DL3*001		2DL3*002			2DL1C*002	2DL1T*004	2DL4T1*005	3DL1*005	2DL5T1*005	2DS3T1*001	2DL4T2*011					2DS4*007	3DL2*001	1	0.001
cB01~tB01	3DL3*014	2DS2*001	2DL2*001	2DL5C*002	2DS3C*001	2DL1C*004		2DL4T1*005	3DS1*013	2DL5T1*005	2DS3T1*002					2DS1*002		3DL2*007	1	0.001
cB01~tA01	3DL3*003	2DS2*001	2DL2*001	2DL5C*002	2DS3C*001	2DL1C*007		2DL4T1*011	3DL1*005								2DS4*007	3DL2*010	1	0.001
cA01~tA01	3DL3*027		2DL3*005			2DL1C*001		2DL4T1*001	3DL1*008								2DS4*003	3DL2*009	1	0.001
cA01~tA01	3DL3*013		2DL3*002			2DL1C*002		2DL4T1*008	3DL1*004								2DS4*006	3DL2*011	1	0.001
cA01~tB05	3DL3*027		2DL3*001			2DL1C*001		2DL4T1*001	3DL1*002			2DL4T2*001					2DS4*001	3DL2*002	1	0.001
cA01~tB05	3DL3*017		2DL3*002			2DL1C*002		2DL4T1*008	3DL1*001			2DL4T2*005					2DS4*007	3DL2*003	1	0.001
cB01~tA01	3DL3*003	2DS2*001	2DL2*001	2DL5C*002	2DS3C*001	2DL1C*004		2DL4T1*011	3DL1*005								2DS4*003	3DL2*009	1	0.001
cA01~tB01	3DL3*029		2DL3*005			2DL1C*001		2DL4T1*005	3DS1*013	2DL5T1*005	2DS3T1*002					2DS1*002		3DL2*007	1	0.001
cA02~tB02	3DL3*006		2DL3*001													2DS1*005		3DL2*017	1	0.001
cB01~tA01	3DL3*003	2DS2*001	2DL2*001	2DL5C*002	2DS3C*001	2DL1C*004		2DL4T1*005	3DL1*005								2DS4*007	3DL2*010	1	0.001
cB01~tA01	3DL3*007	2DS2*001	2DL2*001	2DL5C*002	2DS3C*001	2DL1C*004		2DL4T1*001	3DL1*002								2DS4*001	3DL2*002	1	0.001
cA01~tA01	3DL3*004		2DL3*001			2DL1C*003		2DL4T1*002	3DL1*001								2DS4*003	3DL2*006	1	0.001
cB05~tB01	3DL3*006	2DS2*001				2DL1C*002		2DL4T1*005	3DS1*013	2DL5T1*001	2DS5T1*002					2DS1*002		3DL2*007	1	0.001
cA01~tA01	3DL3*009		2DL3*001			2DL1C*003		2DL4T1*008	3DL1*001								2DS4*003	3DL2*009	1	0.001
cA01~tA01	3DL3*010		2DL3*001			2DL1C*003		2DL4T1*008	3DL1*001								2DS4*003	3DL2*005	1	0.001
cA01~tB06	3DL3*015		2DL3*002			2DL1C*002	2DL1T*004	2DL4T1*006	3DL1*007	2DL5T1*005	2DS3T1*001	2DL4T2*006					2DS4*004	3DL2*008	1	0.001
cA01~tA01	3DL3*013		2DL3*002			2DL1C*002		2DL4T1*008	3DL1*019								2DS4*006	3DL2*005	1	0.001
cA01~tA01	3DL3*001		2DL3*001			2DL1C*003		2DL4T1*006	3DL1*007								2DS4*004	3DL2*008	1	0.001
cA01~tB01	3DL3*009		2DL3*001			2DL1C*003		2DL4T1*011	3DS1*013	2DL5T1*001	2DS5T1*002					2DS1*005		3DL2*007	1	0.001
cB02~tA01	3DL3*003	2DS2*001	2DL2*001					2DL4T1*008	3DL1*001								2DS4*003	3DL2*009	1	0.001
cB02~tA01	3DL3*014	2DS2*001	2DL2*001					2DL4T1*008	3DL1*001								2DS4*003	3DL2*003	1	0.001
cA01~tA01	3DL3*001		2DL3*001			2DL1C*003		2DL4T1*008	3DL1*004								2DS4*006	3DL2*005	1	0.001
cA01~tA01	3DL3*009		2DL3*002			2DL1C*002		2DL4T1*008	3DL1*004								2DS4*006	3DL2*009	1	0.001
cA01~tA01	3DL3*009		2DL3*003			2DL1C*003		2DL4T1*001	3DL1*015								2DS4*001	3DL2*002	1	0.001
cA01~tB05	3DL3*001		2DL3*002			2DL1C*002		2DL4T1*001	3DL1*002			2DL4T2*005					2DS4*001	3DL2*002	1	0.001
cA01~tA01	3DL3*013		2DL3*002			2DL1C*002		2DL4T1*011	3DL1*005								2DS4*003	3DL2*001	1	0.001
cA01~tB05	3DL3*013		2DL3*002			2DL1C*002		2DL4T1*005	3DL1*007			2DL4T2*005					2DS4*004	3DL2*008	1	0.001
cB01~tA01	3DL3*003	2DS2*001	2DL2*001	2DL5C*002	2DS3C*001	2DL1C*004		2DL4T1*008	3DL1*001								2DS4*003	3DL2*011	1	0.001
cA01~tB01	3DL3*031		2DL3*001			2DL1C*003		2DL4T1*005	3DS1*013	2DL5T1*001	2DS5T1*002					2DS1*002		3DL2*007	1	0.001
cB01~tB01	3DL3*003	2DS2*008	2DL2*001	2DL5C*002	2DS3C*001	2DL1C*004		2DL4T1*005	3DS1*013	2DL5T1*005	2DS3T1*002					2DS1*002		3DL2*007	1	0.001
cB01~tA01	3DL3*045	2DS2*001	2DL2*001	2DL5C*002	2DS3C*001	2DL1C*004		2DL4T1*011	3DL1*005								2DS4*007	3DL2*001	1	0.001
cB02~tB01	3DL3*028	2DS2*001	2DL2*003					2DL4T1*005	3DS1*013	2DL5T1*001	2DS5T1*002					2DS1*002		3DL2*007	1	0.001
cA01~tB06	3DL3*002		2DL3*002			2DL1C*002	2DL1T*004	2DL4T1*011	3DL1*005	2DL5T1*005	2DS3T1*001	2DL4T2*011					2DS4*007	3DL2*001	1	0.001
cA01~tA01	3DL3*001		2DL3*002			2DL1C*002		2DL4T1*001	3DL1*008								2DS4*003	3DL2*042N	1	0.001
