# Supplementary material for: Allele-Level Haplotype Frequencies and Pairwise Linkage Disequilibrium for 14 KIR Loci in 506 European-American Individuals
Source: PLoS One. 2012 Nov 5;7(11):e47491. doi: 10.1371/journal.pone.0047491 (PMC3489906; doi:10.1371/journal.pone.0047491)
Supplement: Table S4 — Allele frequencies. Absence of a locus is denoted by NNNN. (XLSX) [file pone.0047491.s004.xlsx]

## Sheet: Sheet1
Supplemental Table 4. Allele frequencies. Absence of a locus is denoted by NNNN.
Region	Locus	Allele	Frequency
Cen	2DL1C	2DL1C*003	0.36957
Cen	2DL1C	2DL1C*002	0.23715
Cen	2DL1C	2DL1C*NNNN	0.18874
Cen	2DL1C	2DL1C*004	0.1413
Cen	2DL1C	2DL1C*001	0.04941
Cen	2DL1C	2DL1C*008	0.00494
Cen	2DL1C	2DL1C*020	0.00296
Cen	2DL1C	2DL1C*007	0.00296
Cen	2DL1C	2DL1C*009	0.00198
Cen	2DL1C	2DL1C*021	0.00099
Tel	2DL1T	2DL1T*NNNN	0.98814
Tel	2DL1T	2DL1T*004	0.00692
Tel	2DL1T	2DL1T*001	0.00494
Cen	2DL2L3	2DL3*001	0.37451
Cen	2DL2L3	2DL3*002	0.24308
Cen	2DL2L3	2DL2*001	0.17095
Cen	2DL2L3	2DL2*003	0.14229
Cen	2DL2L3	2DL3*005	0.04644
Cen	2DL2L3	2DL2*005	0.01285
Cen	2DL2L3	2DL2L3*NNNN	0.00494
Cen	2DL2L3	2DL3*003	0.00395
Cen	2DL2L3	2DL3*006	0.00099
Tel	2DL4T1	2DL4T1*008	0.33992
Tel	2DL4T1	2DL4T1*001	0.26087
Tel	2DL4T1	2DL4T1*005	0.20257
Tel	2DL4T1	2DL4T1*011	0.13636
Tel	2DL4T1	2DL4T1*006	0.02668
Tel	2DL4T1	2DL4T1*NNNN	0.01779
Tel	2DL4T1	2DL4T1*002	0.00988
Tel	2DL4T1	2DL4T1*009	0.00099
Tel	2DL4T1	2DL4T1*010	0.00099
Tel	2DL4T1	2DL4T1*014	0.00099
Tel	2DL4T1	2DL4T1*015	0.00099
Tel	2DL4T1	2DL4T1*012	0.00099
Tel	2DL4T1	2DL4T1*016	0.00099
Tel	2DL4T2	2DL4T2*NNNN	0.97036
Tel	2DL4T2	2DL4T2*005	0.01383
Tel	2DL4T2	2DL4T2*011	0.00889
Tel	2DL4T2	2DL4T2*001	0.00198
Tel	2DL4T2	2DL4T2*006	0.00198
Tel	2DL4T2	2DL4T2*008	0.00198
Tel	2DL4T2	2DL4T2*002	0.00099
Cen	2DL5C	2DL5C*NNNN	0.84387
Cen	2DL5C	2DL5C*002	0.1413
Cen	2DL5C	2DL5C*008	0.00988
Cen	2DL5C	2DL5C*006	0.00198
Cen	2DL5C	2DL5C*016	0.00099
Cen	2DL5C	2DL5C*005	0.00099
Cen	2DL5C	2DL5C*009	0.00099
Tel	2DL5T1	2DL5T1*NNNN	0.79447
Tel	2DL5T1	2DL5T1*001	0.15613
Tel	2DL5T1	2DL5T1*005	0.04743
Tel	2DL5T1	2DL5T1*015	0.00099
Tel	2DL5T1	2DL5T1*014	0.00099
Tel	2DL5T2	2DL5T2*NNNN	0.99605
Tel	2DL5T2	2DL5T2*005	0.00296
Tel	2DL5T2	2DL5T2*001	0.00099
Tel	2DS1	2DS1*NNNN	0.78458
Tel	2DS1	2DS1*002	0.20949
Tel	2DS1	2DS1*005	0.00395
Tel	2DS1	2DS1*008	0.00099
Tel	2DS1	2DS1*006	0.00099
Cen	2DS2	2DS2*NNNN	0.66897
Cen	2DS2	2DS2*001	0.30534
Cen	2DS2	2DS2*002	0.01976
Cen	2DS2	2DS2*005	0.00395
Cen	2DS2	2DS2*007	0.00099
Cen	2DS2	2DS2*008	0.00099
Cen	2DS3S5C	2DS3S5C*NNNN	0.8587
Cen	2DS3S5C	2DS3C*001	0.1413
Tel	2DS3S5T1	2DS3S5T1*NNNN	0.77964
Tel	2DS3S5T1	2DS5T1*002	0.167
Tel	2DS3S5T1	2DS3T1*002	0.0336
Tel	2DS3S5T1	2DS3T1*001	0.01186
Tel	2DS3S5T1	2DS3T1*003N	0.00692
Tel	2DS3S5T1	2DS5T1*005	0.00099
Tel	2DS3S5T2	2DS3S5T2*NNNN	0.99605
Tel	2DS3S5T2	2DS5T2*002	0.00296
Tel	2DS3S5T2	2DS3T2*001	0.00099
Tel	2DS4	2DS4*003	0.28261
Tel	2DS4	2DS4*NNNN	0.21542
Tel	2DS4	2DS4*001	0.20257
Tel	2DS4	2DS4*006	0.14921
Tel	2DS4	2DS4*007	0.12055
Tel	2DS4	2DS4*004	0.02866
Tel	2DS4	2DS4*008	0.00099
Tel	3DL1S1T1	3DS1T1*013	0.2164
Tel	3DL1S1T1	3DL1*001	0.18182
Tel	3DL1S1T1	3DL1*004	0.13834
Tel	3DL1S1T1	3DL1*005	0.12846
Tel	3DL1S1T1	3DL1*002	0.11759
Tel	3DL1S1T1	3DL1*015	0.06225
Tel	3DL1S1T1	3DL1*008	0.05929
Tel	3DL1S1T1	3DL1*007	0.02273
Tel	3DL1S1T1	3DL1S1T1*NNNN	0.01779
Tel	3DL1S1T1	3DL1*009	0.01581
Tel	3DL1S1T1	3DL1*020	0.01581
Tel	3DL1S1T1	3DL1*019	0.00791
Tel	3DL1S1T1	3DS1T1*049N	0.00395
Tel	3DL1S1T1	3DL1*052	0.00296
Tel	3DL1S1T1	3DL1*018	0.00198
Tel	3DL1S1T1	3DS1T1*010	0.00099
Tel	3DL1S1T1	3DS1T1*014	0.00099
Tel	3DL1S1T1	3DL1*053	0.00099
Tel	3DL1S1T1	3DL1*017	0.00099
Tel	3DL1S1T1	3DL1*073	0.00099
Tel	3DL1S1T1	3DS1T1*058	0.00099
Tel	3DL1S1T1	3DL1*033	0.00099
Tel	3DL1S1T2	3DL1S1T2*NNNN	0.97036
Tel	3DL1S1T2	3DL1*005	0.00889
Tel	3DL1S1T2	3DL1*002	0.00593
Tel	3DL1S1T2	3DL1*007	0.00395
Tel	3DL1S1T2	3DS1T2*013	0.00395
Tel	3DL1S1T2	3DL1*004	0.00198
Tel	3DL1S1T2	3DL1*016	0.00099
Tel	3DL1S1T2	3DL1*072	0.00099
Tel	3DL1S1T2	3DL1*001	0.00099
Tel	3DL1S1T2	3DL1*019	0.00099
Tel	3DL1S1T2	3DL1*009	0.00099
Tel	3DL2	3DL2*001	0.25395
Tel	3DL2	3DL2*007	0.19565
Tel	3DL2	3DL2*002	0.17984
Tel	3DL2	3DL2*009	0.07806
Tel	3DL2	3DL2*005	0.07213
Tel	3DL2	3DL2*003	0.05929
Tel	3DL2	3DL2*011	0.05138
Tel	3DL2	3DL2*010	0.03557
Tel	3DL2	3DL2*008	0.02866
Tel	3DL2	3DL2*006	0.00988
Tel	3DL2	3DL2*019	0.00692
Tel	3DL2	3DL2*018	0.00593
Tel	3DL2	3DL2*020	0.00395
Tel	3DL2	3DL2*013	0.00198
Tel	3DL2	3DL2*034	0.00198
Tel	3DL2	3DL2*015	0.00198
Tel	3DL2	3DL2*048	0.00198
Tel	3DL2	3DL2*NNNN	0.00198
Tel	3DL2	3DL2*043	0.00099
Tel	3DL2	3DL2*021	0.00099
Tel	3DL2	3DL2*044	0.00099
Tel	3DL2	3DL2*045	0.00099
Tel	3DL2	3DL2*046	0.00099
Tel	3DL2	3DL2*047	0.00099
Tel	3DL2	3DL2*042N	0.00099
Tel	3DL2	3DL2*032	0.00099
Tel	3DL2	3DL2*017	0.00099
Cen	3DL3	3DL3*001	0.21245
Cen	3DL3	3DL3*003	0.18972
Cen	3DL3	3DL3*002	0.12648
Cen	3DL3	3DL3*009	0.10672
Cen	3DL3	3DL3*014	0.07213
Cen	3DL3	3DL3*013	0.07213
Cen	3DL3	3DL3*007	0.03755
Cen	3DL3	3DL3*015	0.02273
Cen	3DL3	3DL3*010	0.0168
Cen	3DL3	3DL3*008	0.0168
Cen	3DL3	3DL3*006	0.01581
Cen	3DL3	3DL3*004	0.01581
Cen	3DL3	3DL3*025	0.01285
Cen	3DL3	3DL3*011	0.01186
Cen	3DL3	3DL3*017	0.01087
Cen	3DL3	3DL3*027	0.00889
Cen	3DL3	3DL3*041	0.00593
Cen	3DL3	3DL3*020	0.00593
Cen	3DL3	3DL3*030	0.00494
Cen	3DL3	3DL3*016	0.00494
Cen	3DL3	3DL3*028	0.00395
Cen	3DL3	3DL3*026	0.00395
Cen	3DL3	3DL3*018	0.00296
Cen	3DL3	3DL3*019	0.00296
Cen	3DL3	3DL3*044	0.00198
Cen	3DL3	3DL3*045	0.00198
Cen	3DL3	3DL3*005	0.00198
Cen	3DL3	3DL3*031	0.00198
Cen	3DL3	3DL3*047	0.00099
Cen	3DL3	3DL3*042	0.00099
Cen	3DL3	3DL3*021	0.00099
Cen	3DL3	3DL3*029	0.00099
Cen	3DL3	3DL3*043	0.00099
Cen	3DL3	3DL3*046	0.00099
Cen	3DL3	3DL3*036	0.00099
