# Supplementary material for: Allele-Level Haplotype Frequencies and Pairwise Linkage Disequilibrium for 14 KIR Loci in 506 European-American Individuals
Source: PLoS One. 2012 Nov 5;7(11):e47491. doi: 10.1371/journal.pone.0047491 (PMC3489906; doi:10.1371/journal.pone.0047491)
Supplement: Table S5 — Regional haplotype frequencies. Frequencies of the centromeric and telomeric haplotypes separately and combined into full-length haplotypes. Also, D and D’ statistics for the full-length haplotypes. (XLSX) [file pone.0047491.s005.xlsx]

## Sheet: Sheet1
Supplemental Table 5. Regional haplotype frequencies. Frequencies of the centromeric and telomeric haplotypes separately and combined into full-length haplotypes. Also, D and D’ statistics for the full-length haplotypes.
Centromeric region	Telomeric region	Frequency of centromeric haplotype	Frequency of telomeric haplotype	Expected frequency of the full haplotype	Estimated frequency of the full haplotype	D	D'
cA01	tA01	0.66502	0.75889	0.50468	0.54051	0.03583	0.22349
cA01	tB01	0.66502	0.19368	0.1288	0.09486	-0.03394	-0.26349
cA01	tB04	0.66502	0.00395	0.00263	0.00395	0.00132	1
cA01	tB05	0.66502	0.01779	0.01183	0.01779	0.00596	1
cA01	tB06	0.66502	0.00791	0.00526	0.00791	0.00265	1
cA02	tB02	0.00296	0.00099	0	0.00099	0.00099	1
cA02	tB07	0.00296	0.00198	1e-05	0.00198	0.00197	1
cB01	tA01	0.14032	0.75889	0.10649	0.07213	-0.03435	-0.32259
cB01	tB01	0.14032	0.19368	0.02718	0.06818	0.04101	0.36243
cB02	tA01	0.17095	0.75889	0.12973	0.14328	0.01355	0.32872
cB02	tB01	0.17095	0.19368	0.03311	0.02767	-0.00544	-0.16433
cB03	tA01	0.00099	0.75889	0.00075	0.00099	0.00024	1
cB04	tB03	0.01482	0.01482	0.00022	0.01482	0.0146	1
cB05	tA01	0.00494	0.75889	0.00375	0.00198	-0.00177	-0.47292
cB05	tB01	0.00494	0.19368	0.00096	0.00296	0.00201	0.50392
