# Supplementary material for: Allele-Level Haplotype Frequencies and Pairwise Linkage Disequilibrium for 14 KIR Loci in 506 European-American Individuals
Source: PLoS One. 2012 Nov 5;7(11):e47491. doi: 10.1371/journal.pone.0047491 (PMC3489906; doi:10.1371/journal.pone.0047491)
Supplement: Table S6 — Genotypes with ambiguous haplotype pair predictions. Each locus-level genotype is mapped to up to eight distinct structural haplotypes pairs. (XLS) [file pone.0047491.s006.xls]

## Sheet: Sheet1
Supplemental Table 6. Genotypes with ambiguous haplotype pair predictions. Each locus-level genotype is mapped to up to eight distinct structural haplotypes pairs.
3DL3	2DL3	2DS2	2DL2	2DL5	2DS3S5	2DL1	2DL4	3DS1	3DL1	2DS1	2DS4	3DL2	Genotype	Typing genotype	Number of ambiguious haplotype pairs	Haplotype Pair Prediction 1	Haplotype Pair Prediction 2	Haplotype Pair Prediction 3	Haplotype Pair Prediction 4	Haplotype Pair Prediction 5	Haplotype Pair Prediction 6	Haplotype Pair Prediction 7	Haplotype Pair Prediction 8
Y	Y	N	N	N	N	Y	Y	N	Y	Y	Y	Y	3DL3-2DL3-2DL1C-2DL4-3DL1-2DS1-2DS4-3DL2	3DL3-2DL3-2DL1-2DL4-3DL1-2DS1-2DS4-3DL2	2	cA01~tA01+cA02~tB02	cA01~tA01+cA02~tB07
Y	Y	N	N	Y	Y	Y	Y	Y	N	Y	N	Y	3DL3-2DL3-2DL1C-2DL1T-2DL4-3DS1-2DL5T-2DS3S5T-2DS1-3DL2	3DL3-2DL3-2DL1-2DL4-3DS1-2DL5-2DS3S5-2DS1-3DL2	7	cA01~tB01+cA01~tB01	cA01~tB01+cA01~tB04	cA01~tB01+cA02~tB02	cA01~tB01+cA02~tB07	cA01~tB04+cA01~tB04	cA01~tB04+cA02~tB02	cA01~tB04+cA02~tB07
Y	Y	N	N	Y	Y	Y	Y	Y	Y	Y	Y	Y	3DL3-2DL3-2DL1C-2DL1T-2DL4-3DS1-3DL1-2DL5T-2DS3S5T-2DS1-2DS4-3DL2	3DL3-2DL3-2DL1-2DL4-3DS1-3DL1-2DL5-2DS3S5-2DS1-2DS4-3DL2	8	cA01~tA01+cA01~tB01	cA01~tA01+cA01~tB04	cA01~tB01+cA01~tB05	cA01~tB01+cA01~tB06	cA01~tB04+cA01~tB05	cA01~tB04+cA01~tB06	cA01~tB06+cA02~tB02	cA01~tB06+cA02~tB07
Y	Y	N	N	Y	Y	Y	Y	Y	Y	N	Y	Y	3DL3-2DL3-2DL1C-2DL1T-2DL4-3DS1-3DL1-2DL5T-2DS3S5T-2DS4-3DL2	3DL3-2DL3-2DL1-2DL4-3DS1-3DL1-2DL5-2DS3S5-2DS4-3DL2	3	cA01~tA01+cA01~tB06	cA01~tB05+cA01~tB06	cA01~tB06+cA01~tB06
Y	Y	N	N	N	N	Y	Y	Y	Y	Y	Y	Y	3DL3-2DL3-2DL1C-2DL4-3DS1-3DL1-2DS1-2DS4-3DL2	3DL3-2DL3-2DL1-2DL4-3DS1-3DL1-2DS1-2DS4-3DL2	2	cA01~tB05+cA02~tB02	cA01~tB05+cA02~tB07
Y	Y	N	N	N	N	Y	Y	Y	Y	N	Y	Y	3DL3-2DL3-2DL1C-2DL4-3DS1-3DL1-2DS4-3DL2	3DL3-2DL3-2DL1-2DL4-3DS1-3DL1-2DS4-3DL2	2	cA01~tA01+cA01~tB05	cA01~tB05+cA01~tB05
Y	Y	N	N	Y	Y	Y	Y	N	Y	Y	Y	Y	3DL3-2DL3-2DL5C-2DS3S5C-2DL1C-2DL4-3DL1-2DS1-2DS4-3DL2	3DL3-2DL3-2DL5-2DS3S5-2DL1-2DL4-3DL1-2DS1-2DS4-3DL2	2	cA02~tB02+cB03~tA01	cA02~tB07+cB03~tA01
Y	Y	N	N	Y	Y	Y	Y	N	Y	N	Y	Y	3DL3-2DL3-2DL5C-2DS3S5C-2DL1C-2DL4-3DL1-2DS4-3DL2	3DL3-2DL3-2DL5-2DS3S5-2DL1-2DL4-3DL1-2DS4-3DL2	2	cA01~tA01+cB03~tA01	cB03~tA01+cB03~tA01
Y	Y	N	N	N	N	N	N	N	N	Y	N	Y	3DL3-2DL3-2DS1-3DL2	3DL3-2DL3-2DS1-3DL2	2	cA02~tB02+cA02~tB02	cA02~tB02+cA02~tB07
Y	Y	Y	N	N	N	Y	Y	N	Y	Y	Y	Y	3DL3-2DL3-2DS2-2DL1C-2DL4-3DL1-2DS1-2DS4-3DL2	3DL3-2DL3-2DS2-2DL1-2DL4-3DL1-2DS1-2DS4-3DL2	2	cA02~tB02+cB05~tA01	cA02~tB07+cB05~tA01
Y	Y	Y	N	Y	Y	Y	Y	Y	N	Y	N	Y	3DL3-2DL3-2DS2-2DL1C-2DL4-3DS1-2DL5T-2DS3S5T-2DS1-3DL2	3DL3-2DL3-2DS2-2DL1-2DL4-3DS1-2DL5-2DS3S5-2DS1-3DL2	3	cA01~tB01+cB05~tB01	cA02~tB02+cB05~tB01	cA02~tB07+cB05~tB01
Y	Y	Y	N	Y	Y	Y	Y	Y	N	Y	Y	Y	3DL3-2DL3-2DS2-2DL1C-2DL1T-2DL4-3DS1-3DL1-2DL5T-2DS3S5T-2DS1-2DS4-3DL2	3DL3-2DL3-2DS2-2DL1-2DL4-3DS1-3DL1-2DL5-2DS3S5-2DS1-2DS4-3DL2	5	cA01~tA01+cB05~tB01	cA01~tB01+cB05~tA01	cA01~tB04+cB05~tA01	cA01~tB05+cB05~tB01	cA01~tB06+cB05~tB01
Y	Y	Y	Y	Y	Y	Y	Y	Y	Y	Y	Y	Y	3DL3-2DL3-2DS2-2DL2-2DL1C-2DL1T-2DL4-3DS1-3DL1-2DL5T-2DS3S5T-2DS1-2DS4-3DL2	3DL3-2DL3-2DS2-2DL2-2DL1-2DL4-3DS1-3DL1-2DL5-2DS3S5-2DS1-2DS4-3DL2	2	cA01~tB04+cB02~tA01	cA01~tB06+cB02~tB01
Y	Y	Y	Y	N	N	Y	Y	N	Y	N	Y	Y	3DL3-2DL3-2DS2-2DL2-2DL1C-2DL4-3DL1-2DS4-3DL2	3DL3-2DL3-2DS2-2DL2-2DL1-2DL4-3DL1-2DS4-3DL2	3	cA01~tA01+cB02~tB01	cA01~tB01+cB02~tA01	cA01~tB05+cB02~tB01
Y	Y	Y	Y	N	N	N	Y	N	Y	Y	Y	Y	3DL3-2DL3-2DS2-2DL2-2DL4-3DL1-2DS1-2DS4-3DL2	3DL3-2DL3-2DS2-2DL2-2DL4-3DL1-2DS1-2DS4-3DL2	2	cA02~tB02+cB02~tA01	cA02~tB07+cB02~tA01
Y	Y	Y	Y	Y	Y	N	Y	Y	N	Y	N	Y	3DL3-2DL3-2DS2-2DL2-2DL4-3DS1-2DL5T-2DS3S5T-2DS1-3DL2	3DL3-2DL3-2DS2-2DL2-2DL4-3DS1-2DL5-2DS3S5-2DS1-3DL2	2	cA02~tB02+cB02~tB01	cA02~tB07+cB02~tB01
Y	Y	Y	Y	Y	Y	Y	Y	N	Y	Y	Y	Y	3DL3-2DL3-2DS2-2DL2-2DL5C-2DS3S5C-2DL1C-2DL4-3DL1-2DS1-2DS4-3DL2	3DL3-2DL3-2DS2-2DL2-2DL5-2DS3S5-2DL1-2DL4-3DL1-2DS1-2DS4-3DL2	2	cA02~tB02+cB01~tA01	cA02~tB07+cB01~tA01
Y	Y	Y	Y	Y	Y	Y	Y	N	Y	N	Y	Y	3DL3-2DL3-2DS2-2DL2-2DL5C-2DS3S5C-2DL1C-2DL4-3DL1-2DS4-3DL2	3DL3-2DL3-2DS2-2DL2-2DL5-2DS3S5-2DL1-2DL4-3DL1-2DS4-3DL2	3	cA01~tA01+cB01~tA01	cB01~tA01+cB03~tA01	cB02~tA01+cB03~tA01
Y	Y	Y	Y	Y	Y	Y	Y	Y	Y	Y	Y	Y	3DL3-2DL3-2DS2-2DL2-2DL5C-2DS3S5C-2DL1C-2DL1T-2DL4-3DS1-3DL1-2DL5T-2DS3S5T-2DS1-2DS4-3DL2	3DL3-2DL3-2DS2-2DL2-2DL5-2DS3S5-2DL1-2DL4-3DS1-3DL1-2DS1-2DS4-3DL2	7	cA01~tA01+cB01~tB01	cA01~tB01+cB01~tA01	cA01~tB04+cB01~tA01	cA01~tB05+cB01~tB01	cA01~tB06+cB01~tB01	cB01~tB01+cB03~tA01	cB02~tB01+cB03~tA01
Y	Y	Y	Y	Y	Y	N	N	N	N	N	N	Y	3DL3-2DL3-2DS2-2DL2-2DL5C-2DS3S5T-2DS1-3DL2	3DL3-2DL3-2DS2-2DL2-2DL5-2DS3S5-2DS1-3DL2	2	cA02~tB02+cB04~tB03	cA02~tB07+cB04~tB03
Y	Y	Y	Y	Y	Y	Y	Y	Y	N	Y	N	Y	3DL3-2DL3-2DS2-2DL2-2DL5-2DS3S5-2DL1-2DL4-3DS1-2DS1-3DL2	3DL3-2DL3-2DS2-2DL2-2DL5-2DS3S5-2DL1-2DL4-3DS1-2DS1-3DL2	3	cA01~tB01+cB01~tB01	cA02~tB02+cB01~tB01	cA02~tB07+cB01~tB01
Y	N	Y	Y	Y	Y	Y	Y	Y	Y	Y	Y	Y	3DL3-2DS2-2DL2-2DL1C-2DL4-3DS1-3DL1-2DL5T-2DS3S5T-2DS1-2DS4-3DL2	3DL3-2DS2-2DL2-2DL1-2DL4-3DS1-3DL1-2DL5-2DS3S5-2DS1-2DS4-3DL2	2	cB02~tA01+cB05~tB01	cB02~tB01+cB05~tA01
Y	N	Y	Y	Y	Y	Y	Y	N	Y	N	Y	Y	3DL3-2DS2-2DL2-2DL5C-2DS3S5C-2DL1C-2DL4-3DL1-2DS4-3DL2	3DL3-2DS2-2DL2-2DL5-2DS3S5-2DL1-2DL4-3DL1-2DS4-3DL2	3	cB01~tA01+cB01~tA01	cB01~tA01+cB02~tA01	cB01~tA01+cB05~tA01
Y	N	Y	Y	Y	Y	Y	Y	Y	N	Y	N	Y	3DL3-2DS2-2DL2-2DL5C-2DS3S5C-2DL1C-2DL4-3DS1-2DL5T-2DS3S5T-2DS1-3DL2	3DL3-2DS2-2DL2-2DL5-2DS3S5-2DL1-2DL4-3DS1-2DS1-3DL2	4	cB01~tB01+cB01~tB01	cB01~tB01+cB02~tB01	cB01~tB01+cB04~tB03	cB01~tB01+cB05~tB01
Y	N	Y	Y	Y	Y	Y	Y	Y	Y	Y	Y	Y	3DL3-2DS2-2DL2-2DL5C-2DS3S5C-2DL1C-2DL4-3DS1-3DL1-2DL5T-2DS3S5T-2DS1-2DS4-3DL2	3DL3-2DS2-2DL2-2DL5-2DS3S5-2DL1-2DL4-3DS1-3DL1-2DS1-2DS4-3DL2	2	cB01~tA01+cB02~tB01	cB01~tA01+cB05~tB01
